# Supplementary material for: Evolutionary Dynamics of the W Chromosome in Caenophidian Snakes
Source: PubMed Central journal article supplement (PMC5793158; doi:10.3390/genes9010005), 2017-12-28
Supplement: genes-09-00005-s001.pdf [file genes-09-00005-s001.pdf]

## Supplementary material

**Table S1.** Summary of species and number of examined individuals used in the current study.

| Species                           | Family         | Number of individuals |   |
|-----------------------------------|----------------|-----------------------|---|
|                                   |                | ♂                     | ♀ |
| <i>Acrochordus javanicus</i>      | Acrochordidae  | 1                     | 3 |
| <i>Elaphe bimaculata</i>          |                |                       | 2 |
| <i>Lampropeltis ruthveni</i>      |                | 1                     | 1 |
| <i>Lampropeltis triangulum</i>    |                |                       | 1 |
| <i>Natrix natrix</i>              | Colubridae     | 1                     | 1 |
| <i>Pantherophis guttatus</i>      |                |                       | 2 |
| <i>Zamenis situla</i>             |                |                       | 1 |
| <i>Homalopsis buccata</i>         | Homalopsidae   | 1                     | 1 |
| <i>Boaedon</i> sp. 1              |                | 1                     | 4 |
| <i>Boaedon</i> sp. 2              | Lamprophiidae  | 1                     | 2 |
| <i>Boaedon</i> sp. 3              |                | 1                     | 1 |
| <i>Crotalus durissus unicolor</i> | Viperidae      |                       | 1 |
| <i>Xenodermus javanicus</i>       | Xenodermatidae | 1                     | 1 |

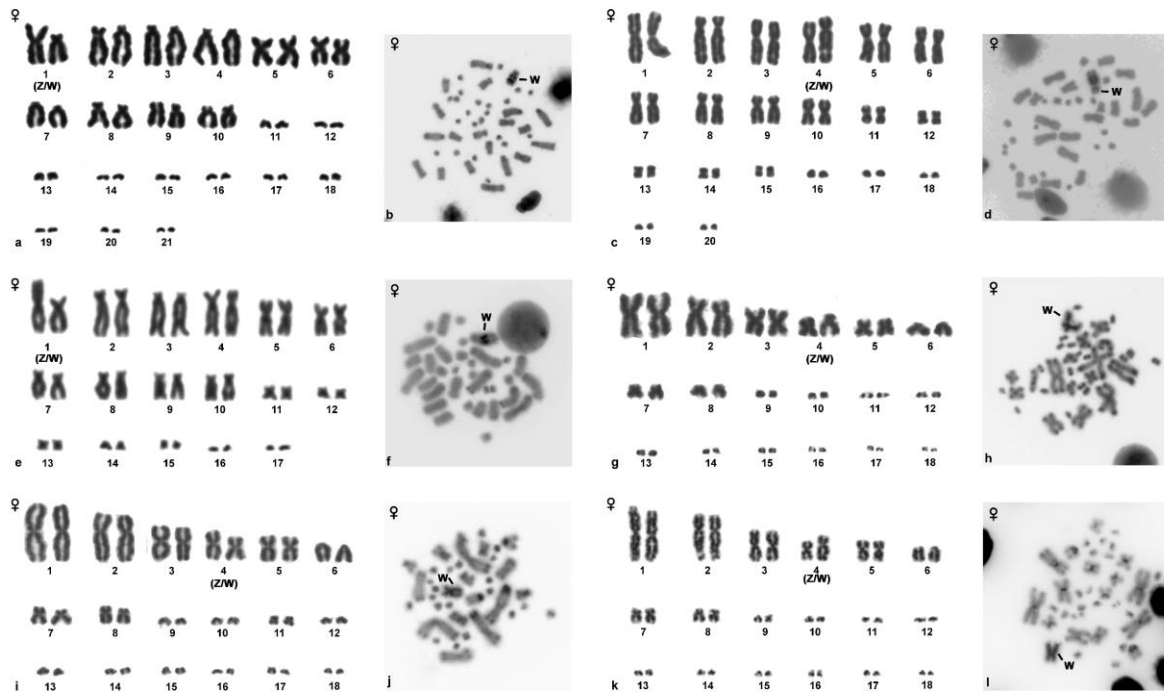

**Figure S1.** Giemsa stained karyotypes and C-banded metaphase spreads of unstudied species from female specimens of *Boaedon* sp.1 (a,b), *Boaedon* sp.2 (c,d), *Boaedon* sp.3 (e,f), *Lampropeltis ruthveni* (g,h), *Lampropeltis triangulum* (i,j) and *Zamenis situla* (k,l).
